# Supplementary material for: Are Fresh Water and Reclaimed Water Safe for Vegetable Irrigation? Empirical Evidence from Lebanon
Source: MDPI journal article supplement (doi:10.3390/w14091437), 2022-04-30
Supplement: s1 [file s1]

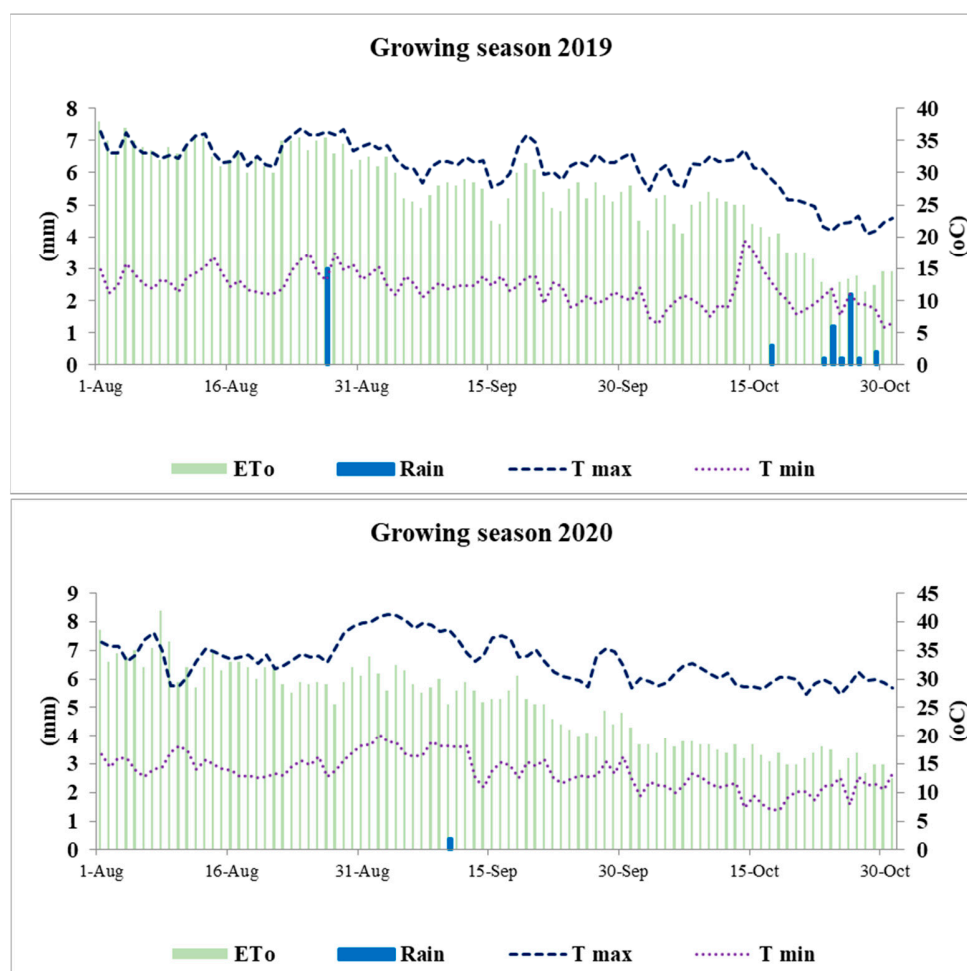

**Figure S1. Rainfall (mm), maximum and minimum temperatures (°C), and reference evapotranspiration (mm) for the growing seasons 2019 and 2020.**

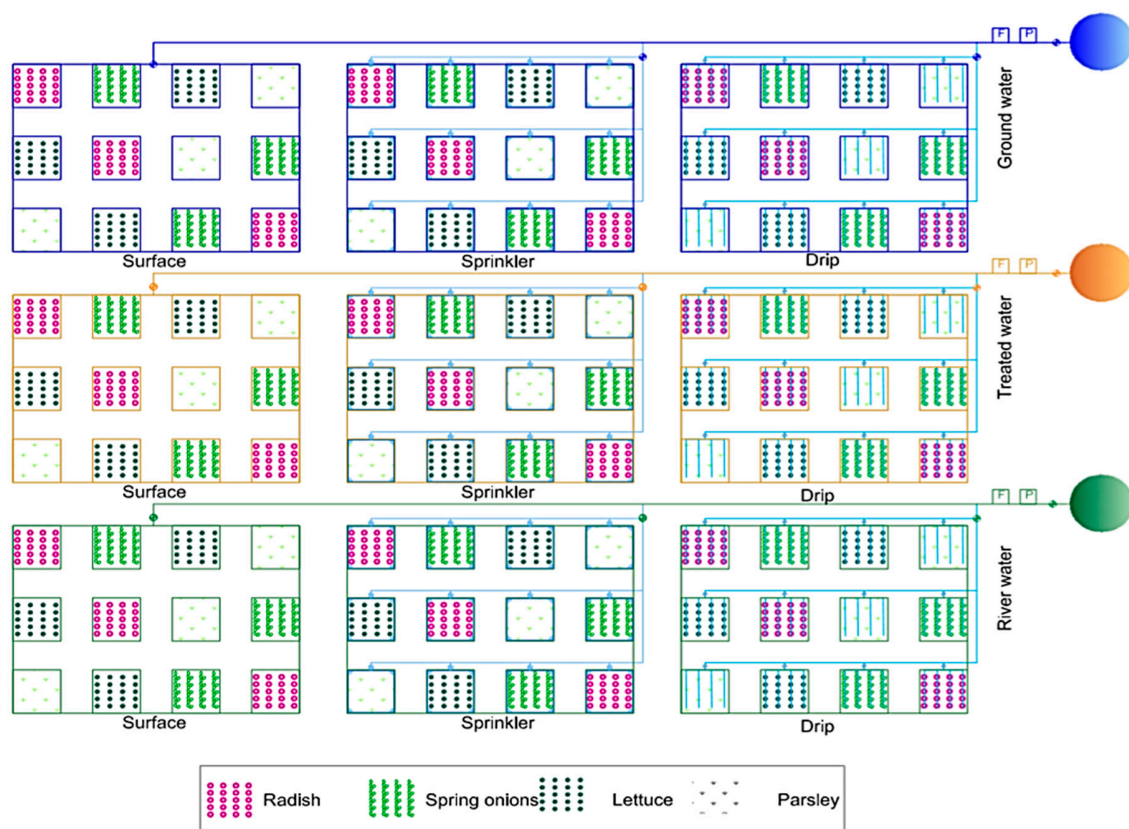

Figure S2. The experimental layout.

**Table S1. Heavy metal maximum permissible limits in vegetable crops.**

|                                                   | Heavy metal concentration (mg/kg) |    |    |    |     |
|---------------------------------------------------|-----------------------------------|----|----|----|-----|
|                                                   | Cr                                | Ni | Zn | Cu | Cd  |
| Maximum permissible limit—WHO<br>=FAO, WHO (2011) | 0.5                               | 10 | 60 | 40 | 0.2 |

**Table S2. Parameters used in the calculation of EDI, HRI, and THQ.**

| Parameters                              | Units     | Values | Reference                                 |
|-----------------------------------------|-----------|--------|-------------------------------------------|
| Conversion factor ( $C_f$ )             | -         | 0.085  | (Rehman et al., 2019)                     |
| Daily food intake ( $D_{FI}$ )—Adult    | kg/day    | 0.345  | (Amin et al., 2013)                       |
| Daily food intake ( $D_{FI}$ )—Children | kg/day    | 0.232  | (Amin et al., 2013)                       |
| Body weight ( $B_w$ )—Adult             | kg        | 73.0   | (Khan et al., 2008)                       |
| Body weight ( $B_w$ )—Children          | kg        | 32.7   | (Khan et al., 2008)                       |
| Exposure frequency ( $E_f$ )            | days/year | 350    | (Qureshi et al., 2016; Yang et al., 2011) |
| Exposure duration ( $E_D$ )             | years     | 70     | (Abbasi et al., 2013; Yang et al., 2011)  |
| Average exposure time ( $AT_n$ )        | days/year | 10950  | (Abbasi et al., 2013; Yang et al., 2011)  |
| Oral reference dose (RfD)               |           |        |                                           |
| Cd                                      | mg/kg     | 0.001  | (FAO/WHO, 2013; USEPA, 2013)              |
| Cu                                      | mg/kg     | 0.04   | (FAO/WHO, 2013; USEPA, 2013)              |
| Cr                                      | mg/kg     | 0.025  | (FAO/WHO, 2013; USEPA, 2013)              |
| Ni                                      | mg/kg     | 1      | (FAO/WHO, 2013; USEPA, 2013)              |
| Zn                                      | mg/kg     | 0.3    | (FAO/WHO, 2013; USEPA, 2013)              |

**Table S3. Treated water categories as proposed by the Lebanese guidelines (FAO, 2011).**

|                                                                                                                                                                                                                                                                                                                                                                                                                                                                                                       |
|-------------------------------------------------------------------------------------------------------------------------------------------------------------------------------------------------------------------------------------------------------------------------------------------------------------------------------------------------------------------------------------------------------------------------------------------------------------------------------------------------------|
| <p><b>Category I</b></p> <p>Fruit trees and crops that are eaten cooked</p> <p>Parks, public gardens, lawns, golf courses and other areas with direct public exposure</p> <p>Water treatment expected to meet the criteria: Secondary treatment + filtration + Disinfection.</p>                                                                                                                                                                                                                      |
| <p><b>Category II</b></p> <p>Fruit trees</p> <p>Lawns, wooded areas, and other areas with limited public access, road sides outside urban areas</p> <p>Landscape impoundments: ponds, water bodies and ornamental streams, where public contact with water is not allowed.</p> <p>Water treatment expected to meet the criteria: Secondary treatment + filtration + disinfection or Secondary treatment + either storage in well-designed series of maturation ponds or infiltration percolation.</p> |
| <p><b>Category III</b></p> <p>Irrigation of cereals and oleaginous seeds, fiber, &amp; seed crops</p> <p>Crops for canning industry, industrial crops</p> <p>Fruit trees (except sprinkler-irrigated)</p> <p>Plant nurseries, ornamental nurseries, wooden areas, green areas with no access to the public</p> <p>Water treatment expected to meet the criteria: Secondary treatment + a few days' storage or Oxidation pond systems.</p>                                                             |

**Table S4. Effects of water sources, irrigation methods, and crops on health risk index.**

| Treatment                  | Cr (ppm)           |                     | Ni (ppm)              |                          | Zn (ppm)            |                       | Cu (ppm)            |                    | Cd (ppm)             |                         |
|----------------------------|--------------------|---------------------|-----------------------|--------------------------|---------------------|-----------------------|---------------------|--------------------|----------------------|-------------------------|
|                            | 2019               | 2020                | 2019                  | 2020                     | 2019                | 2020                  | 2019                | 2020               | 2019                 | 2020                    |
| <b>Water sources</b>       |                    |                     |                       |                          |                     |                       |                     |                    |                      |                         |
| Groundwater                | 0.0054±<br>0.007   | 0.0114±<br>0.016 b  | 0.00002 ±<br>0.000 b  | 0.0000081±<br>0.00002    | 0.0011±<br>0.001 a  | 0.0001±<br>0.0002 a   | 0.2027±<br>0.272    | 0.0214±<br>0.053   | 0.00003 ±<br>0.000 b | 0.000001±<br>0.000004   |
| River—<br>Litani           | 0.0046±<br>0.003   | 0.0185±<br>0.020 a  | 0.00005 ±<br>0.000 a  | 0.00001±<br>0.00004      | 0.0002±<br>0.0003 b | 0.0001±<br>0.0001 b   | 0.0745±<br>0.058    | 0.0245±<br>0.057   | 0.00006±<br>0.000 a  | 0.00001±<br>0.00002     |
| Treated<br>water—<br>Ablah | 0.0061±<br>0.005   | 0.0076±<br>0.0007 c | 0.00006 ±<br>0.0001 a | 0.000009 ±<br>0.00002    | 0.0002±<br>0.0002 b | 0.0001±<br>0.0001 c   | 0.0792 ±<br>0.073   | 0.0170±<br>0.044   | 0.00004±<br>0.000 ab | 0.000003±<br>0.00001    |
| <b>Irrigation methods</b>  |                    |                     |                       |                          |                     |                       |                     |                    |                      |                         |
| Drip                       | 0.0074±<br>0.008   | 0.0096±<br>0.009 b  | 0.00005 ±<br>0.0001   | 0.000± 0.000<br>b        | 0.0008±<br>0.001    | 0.00009±<br>0.00009 b | 0.1885 ±<br>0.273   | 0.000±<br>0.000 b  | 0.00005±<br>0.000    | 0.000003±<br>0.000 b    |
| Sprinkler                  | 0.0038±<br>0.003   | 0.0085±<br>0.007 b  | 0.00004 ±<br>0.000    | 0.000008±<br>0.0002 b    | 0.0004±<br>0.0008   | 0.0001±<br>0.0001 ab  | 0.0782 ±<br>0.084   | 0.0125±<br>0.043 b | 0.00004±<br>0.000    | 0.000005±<br>0.00001 ab |
| Surface                    | 0.0048±<br>0.003   | 0.193±<br>0.0023 a  | 0.00004 ±<br>0.000    | 0.00002±<br>0.00004 a    | 0.0004±<br>0.0007   | 0.0002±<br>0.0001 a   | 0.0897 ±<br>0.064   | 0.0505±<br>0.069 a | 0.00004±<br>0.000    | 0.00001±<br>0.00002 a   |
| <b>Crops</b>               |                    |                     |                       |                          |                     |                       |                     |                    |                      |                         |
| Parsley                    | 0.0067±<br>0.004 b | 0.0146±<br>0.017 a  | 0.00006±<br>0.000 a   | 0.00003±<br>0.00005 a    | 0.0007±<br>0.001 a  | 0.0002±<br>0.0002 a   | 0.01915±<br>0.218 a | 0.0629±<br>0.073 a | 0.00005±<br>0.000 a  | 0.00002 ±<br>0.00003 a  |
| Lettuce                    | 0.0031±<br>0.003 c | 0.0038±<br>0.004 b  | 0.00003±<br>0.00001 b | 0.0000003±<br>0.000001 b | 0.0002±<br>0.0003 b | 0.0001±<br>0.0001 c   | 0.0583±<br>0.048 b  | 0 ± 0 b            | 0.00003±<br>0.000 b  | 0 ± 0 b                 |
| Onion                      | 0.01±<br>0.008 a   | 0.0162±<br>0.017 a  | 0.00007 ±<br>0.0001 a | 0.00001±<br>0.00003 ab   | 0.001±<br>0.001 a   | 0.0001±<br>0.0001 b   | 0.1991±<br>0.225 a  | 0 ± 0 b            | 0.00006 ±<br>0.000 a | 0 ± 0 b                 |
| Radish                     | 0.0015±<br>0.001 d | 0.0153±<br>0.018 a  | 0.00001 ±<br>0.000 c  | 0.0000±<br>0.000 b       | 0.0002±<br>0.0005 c | 0.00009±<br>0.00007 c | 0.0263±<br>0.016 c  | 0 ± 0 b            | 0.00002±<br>0.000 c  | 0 ± 0 b                 |
| <b>Significance</b>        |                    |                     |                       |                          |                     |                       |                     |                    |                      |                         |
| Water<br>sources (W)       | ns                 | ***                 | *                     | ns                       | *                   | ***                   | ns                  | ns                 | *                    | ns                      |
| Irrigation<br>methods (I)  | ns                 | *                   | ns                    | ****                     | ns                  | *                     | ns                  | ****               | ns                   | **                      |
| W x I                      | ns                 | ns                  | ns                    | ns                       | ns                  | ns                    | *                   | ***                | ns                   | *                       |
| Crops (C)                  | ****               | ****                | ****                  | ****                     | ****                | ****                  | ****                | ****               | ****                 | ****                    |
| C x W                      | *                  | ****                | *                     | ***                      | ns                  | ****                  | ns                  | ***                | ns                   | ****                    |
| C x I                      | **                 | **                  | *                     | ****                     | ns                  | ns                    | ns                  | ****               | ns                   | ****                    |
| C x W x I                  | *                  | ***                 | *                     | ****                     | ns                  | ***                   | *                   | ****               | ns                   | ****                    |

ns, \*, \*\*, \*\*\*, \*\*\*\*: Non significant, significant at  $P \leq 0.05$ , 0.01, 0.001, and 0.0001, respectively. Means followed by different letter in each column are significantly different according to the LSD test ( $P = 0.05$ ).

**Table S5. Effects of water sources, irrigation methods, and crops on target health quotient.**

| Treatment                     | Cr (ppm)            |                     | Ni (ppm)            |                     | Zn (ppm)           |                     | Cu (ppm)             |                     | Cd (ppm)              |                     |
|-------------------------------|---------------------|---------------------|---------------------|---------------------|--------------------|---------------------|----------------------|---------------------|-----------------------|---------------------|
|                               | 2019                | 2020                | 2019                | 2020                | 2019               | 2020                | 2019                 | 2020                | 2019                  | 2020                |
| <b>Water sources</b>          |                     |                     |                     |                     |                    |                     |                      |                     |                       |                     |
| Groundwater                   | 0.4124±<br>0.270 b  | 0.6086±<br>0.366 b  | 0.0036±<br>0.002 b  | 0.0012±<br>0.002    | 0.0093±<br>0.006 a | 0.0055±<br>0.029 a  | 0.0012±<br>0.0008 a  | 0.0002±<br>0.0004   | 0.0259±<br>0.000019 b | 0.0017±<br>0.005 b  |
| River—Litani                  | 0.4375±<br>0.166 ab | 0.8612±<br>0.504 a  | 0.007±<br>0.003 a   | 0.0018±<br>0.004    | 0.0053±<br>0.001 b | 0.0044±<br>0.002 b  | 0.0009±<br>0.0004 ab | 0.0002±<br>0.0005   | 0.0622±<br>0.00002 a  | 0.0164±<br>0.037 a  |
| Treated water—Ablah           | 0.4449±<br>0.163 a  | 0.5237±<br>0.275 c  | 0.0072±<br>0.002 a  | 0.0011±<br>0.002    | 0.0054±<br>0.002 b | 0.0042±<br>0.019 b  | 0.0008±<br>0.0003 b  | 0.0001±<br>0.0004   | 0.0704±<br>0.000031 a | 0.0051±<br>0.018 ab |
| <b>Irrigation methods</b>     |                     |                     |                     |                     |                    |                     |                      |                     |                       |                     |
| Drip                          | 0.4616±<br>0.273 ab | 0.6934 ±<br>0.521 b | 0.0062±<br>0.003    | 0.000±<br>0.00 b    | 0.0081±<br>0.006   | 0.0037±<br>0.001 b  | 0.0012±<br>0.0008 a  | 0.000±<br>0.00 b    | 0.0563±<br>0.026 a    | 0.000±<br>0.00 b    |
| Sprinkler                     | 0.3706±<br>0.129 b  | 0.5756±<br>0.261 c  | 0.0053±<br>0.003    | 0.001±<br>0.003 b   | 0.0056±<br>0.002   | 0.0049±<br>0.002 ab | 0.0008±<br>0.0002 b  | 0.0001±<br>0.0003 b | 0.0471±<br>0.032 b    | 0.0074±<br>0.025 ab |
| Surface                       | 0.4626±<br>0.175 a  | 0.7245±<br>0.418 a  | 0.0062±<br>0.003    | 0.0032±<br>0.004 a  | 0.0064±<br>0.002   | 0.0054±<br>0.002 a  | 0.0009±<br>0.0003 a  | 0.0004±<br>0.0006 a | 0.0550±<br>0.039 a    | 0.0159 ±<br>0.034 a |
| <b>Crops</b>                  |                     |                     |                     |                     |                    |                     |                      |                     |                       |                     |
| Parsley                       | 0.4968±<br>0.131 b  | 0.7504±<br>0.545 b  | 0.0069±<br>0.003 b  | 0.0037±<br>0.004 a  | 0.0086±<br>0.004 a | 0.0063±<br>0.002 a  | 0.0013±<br>0.0006 a  | 0.0005±<br>0.0006 a | 0.0593±<br>0.029 b    | 0.0311±<br>0.043 a  |
| Lettuce                       | 0.3362±<br>0.127 c  | 0.3607 ±<br>0.166 c | 0.005±<br>0.002 c   | 0.0001±<br>0.0005 b | 0.0049±<br>0.001 b | 0.0036±<br>0.001 c  | 0.007±<br>0.17 b     | 0.007±<br>0 ± 0 b   | 0.0449±<br>0.024 c    | 0 ± 0 b             |
| Onion                         | 0.6116±<br>0.240 a  | 0.8007±<br>0.298 a  | 0.0084±<br>0.003 a  | 0.0018±<br>0.003 ab | 0.0094±<br>0.005 a | 0.0052±<br>0.002 b  | 0.0013±<br>0.0006 a  | 0.0013±<br>0 ± 0 b  | 0.0784±<br>0.037 a    | 0 ± 0 b             |
| Radish                        | 0.2817±<br>0.099 d  | 0.7462±<br>0.408 b  | 0.34.92±<br>0.001 d | 0.000±<br>0.00b     | 0.0038±<br>0.001 c | 0.0036±<br>0.001 c  | 0.005±<br>0.0001 c   | 0.005±<br>0 ± 0 b   | 0.0287±<br>0.017 d    | 0 ± 0 b             |
| <b>Significance</b>           |                     |                     |                     |                     |                    |                     |                      |                     |                       |                     |
| <b>Water sources (W)</b>      | ns                  | ***                 | **                  | ns                  | *                  | **                  | *                    | ns                  | ***                   | **                  |
| <b>Irrigation methods (I)</b> | *                   | ***                 | ns                  | ****                | ns                 | *                   | *                    | ****                | *                     | **                  |
| <b>W x I</b>                  | *                   | *                   | **                  | **                  | **                 | ns                  | *                    | ***                 | ****                  | *                   |
| <b>Crops (C)</b>              | ****                | ****                | ****                | ***                 | ****               | ****                | ****                 | ****                | ****                  | ****                |
| <b>C x W</b>                  | ****                | ****                | ****                | ***                 | ns                 | ****                | ***                  | ***                 | ****                  | ****                |
| <b>C x I</b>                  | ****                | ****                | ***                 | ****                | ****               | ****                | ****                 | ****                | ****                  | ****                |
| <b>C x W x I</b>              | ****                | ****                | ****                | ****                | ***                | ****                | ****                 | ****                | ****                  | ****                |

Ns, \*, \*\*, \*\*\*, \*\*\*\*: Non significant, significant at  $P \leq 0.05$ , 0.01, 0.001, and 0.0001, respectively. Means followed by different letter in each column are significantly different according to the LSD test ( $P = 0.05$ ).

## References

1. Abbasi A. M., Iqbal J., Khan M. A., Shah M. H. (2013). Health risk assessment and multivariate apportionment of trace metals in wild leafy vegetables from Lesser Himalayas, Pakistan. *Ecotoxicol. Environ. Saf.* 92, 237-244.
2. Amin N., Hussain A., Alamzeb S., Begum S. (2013). Accumulation of heavy metals in edible parts of vegetables irrigated with waste water and their daily intake to adults and children, District Mardan, Pakistan. *Food Chem.* 136, 1515-1523.
3. FAO/WHO (2013). Guidelines for the safe use of wastewater and food stuff, Technical Report of the joint FAO/WHO Volume 2 no. 1, Food and Agriculture Organization (FAO) and Organization (WHO) Geneva, Switzerland.
4. Khan S., Cao Q., Zheng Y. M., Huang Y. Z., Zhu Y. G. (2008). Health risks of heavy metals in contaminated soils and food crops irrigated with wastewater in Beijing, China. *Environ. Pollut.* 152, 686-692.
5. Qureshi A. S., Hussain M. I., Ismail S., Khan Q. M. (2016). Evaluating heavy metal accumulation and potential health risks in vegetables irrigated with treated wastewater. *Chemosphere* 163, 54-61.
6. Rehman K., Bukhari S. M., Andleeb S., Mahmood A., Erinle K. O., Naeem M. M., Imran Q. (2019). Ecological risk assessment of heavy metals in vegetables irrigated with groundwater and wastewater: The particular case of Sahiwal district in Pakistan. *Agric. Water Manag.* 226, <https://doi.org/10.1016/j.agwat.2019.105816>.
7. USEPA (2013). Reference dose (RfD): Description and use in health risk assessments, Background Document 1A, Integrated risk information system (IRIS); United States Environmental Protection Agency Washington, DC.
8. FAO/WHO. FAO/WHO. Joint FAO/WHO (2011). Food Standards Programme Codex Committee on Contaminants in Foods, Fifth Session. pp. 64-89.
9. Yang Q.-w., Yuan Xu, Shou-jiang Liu, Jin-feng He, Fang-yan Long (2011). Concentration and potential health risk of heavy metals in market vegetables in Chongqing, China. *Ecotoxicol. Environ. Saf.* 74, 1664-1669.
